# Supplementary material for: Preassessment clinic interview and patient anxiety
Source: PubMed Central journal article supplement — Saudi J Anaesth. 2016 Oct-Dec;10(4):402–8. doi: 10.4103/1658-354X.177339 (PMC5044723; doi:10.4103/1658-354x.177339), 2016
Supplement: SJA-10-402_Suppl1.pdf [file SJA-10-402_Suppl1.pdf]

**Appendix A**

Questionnaire for patients attending the pre-assessment clinic:

This questionnaire aims to give the anesthetic team feedback on the effect the pre-assessment clinic has on patient anxiety in regards to the anesthesia and operation. Please take the time to fill out this form carefully and truthfully. Thank you.

Personal details:

Age: \_\_\_ Gender: Male  Female

Type of operation: General surgery  urology  obs/gyne  orthopaedics  ENT  eyes  other

Before preassessment clinic:

Please rate the following four statements according to the scale below:

|                                          | Not at all               | 1                        | 2                        | 3                        | 4                        | 5                        | extremely |
|------------------------------------------|--------------------------|--------------------------|--------------------------|--------------------------|--------------------------|--------------------------|-----------|
| I am worried about the anesthesia        | <input type="checkbox"/> |           |
| The anesthesia is on my mind continually | <input type="checkbox"/> |           |
| I am worried about the operation         | <input type="checkbox"/> |           |
| The operation is on my mind continually  | <input type="checkbox"/> |           |

Please choose the word that best suits the blank in each of the following five statements below:

Very anxious; anxious; no difference; calm, very calm

|                                  | 1                        | 2                        | 3                        | 4                        | 5                        |
|----------------------------------|--------------------------|--------------------------|--------------------------|--------------------------|--------------------------|
| I feel _____ at the thought of:  |                          |                          |                          |                          |                          |
| Getting an injection             | <input type="checkbox"/> |
| The anesthetic mask over my face | <input type="checkbox"/> |
| Problems during the operation    | <input type="checkbox"/> |
| Feeling sick after the operation | <input type="checkbox"/> |
| Feeling pain after the operation | <input type="checkbox"/> |

After preassessment clinic:

Please rate the following four statements according to the scale below:

|                                          | Not at all               | 1                        | 2                        | 3                        | 4                        | 5                        | extremely |
|------------------------------------------|--------------------------|--------------------------|--------------------------|--------------------------|--------------------------|--------------------------|-----------|
| I am worried about the anesthesia        | <input type="checkbox"/> |           |
| The anesthesia is on my mind continually | <input type="checkbox"/> |           |
| I am worried about the operation         | <input type="checkbox"/> |           |
| The operation is on my mind continually  | <input type="checkbox"/> |           |

Please choose the word that best suits the blank in each of the following five statements below:

Very anxious; anxious; no difference; calm, very calm

|                                  | 1                        | 2                        | 3                        | 4                        | 5                        |
|----------------------------------|--------------------------|--------------------------|--------------------------|--------------------------|--------------------------|
| I feel _____ at the thought of:  |                          |                          |                          |                          |                          |
| Getting an injection             | <input type="checkbox"/> |
| The anesthetic mask over my face | <input type="checkbox"/> |
| Problems during the operation    | <input type="checkbox"/> |
| Feeling sick after the operation | <input type="checkbox"/> |
| Feeling pain after the operation | <input type="checkbox"/> |

Please rate the following four statements according to the scale below:

|                                            | Not at all               | 1                        | 2                        | 3                        | 4                        | 5                        | definitely |
|--------------------------------------------|--------------------------|--------------------------|--------------------------|--------------------------|--------------------------|--------------------------|------------|
| My worries have been addressed today       | <input type="checkbox"/> |            |
| I would recommend my anesthetist           | <input type="checkbox"/> |            |
| I am satisfied with my visit to the clinic | <input type="checkbox"/> |            |
| I am prepared for my anesthetic/operation  | <input type="checkbox"/> |            |

Do you have any other comments to add in regards to any worries or anxieties about your anesthesia or operation?
